# Supplementary material for: The mitochondrial negative regulator MCJ modulates the interplay between microbiota and the host during ulcerative colitis
Source: PubMed Central journal article supplement (PMC6969106; doi:10.1038/s41598-019-57348-0), 2020-01-17

# The mitochondrial negative regulator MCJ modulates the interplay between microbiota and the host during ulcerative colitis

Miguel Angel Pascual-Itoiz<sup>1†</sup>, Ainize Peña-Cearra<sup>1,2†</sup>, Itziar Martín-Ruiz<sup>1</sup>, José Luis Lavín<sup>1</sup>, Carolina Simó<sup>3</sup>, Héctor Rodríguez<sup>1</sup>, Estibaliz Atondo<sup>1</sup>, Juana María Flores<sup>4</sup>, Ana Carreras-González<sup>1</sup>, Julen Tomás-Cortázar<sup>1</sup>, Diego Barriales<sup>1</sup>, Ainhoa Palacios<sup>1</sup>, Virginia García-Cañas<sup>3</sup>, Aize Pellón<sup>1</sup>, Asier Fullaondo<sup>2</sup>, Ana M<sup>a</sup> Aransay<sup>1,6</sup>, Rafael Prados-Rosales<sup>1</sup>, Rebeca Martín<sup>5</sup>, Juan Anguita<sup>1,7</sup>, Leticia Abecia<sup>1\*</sup>

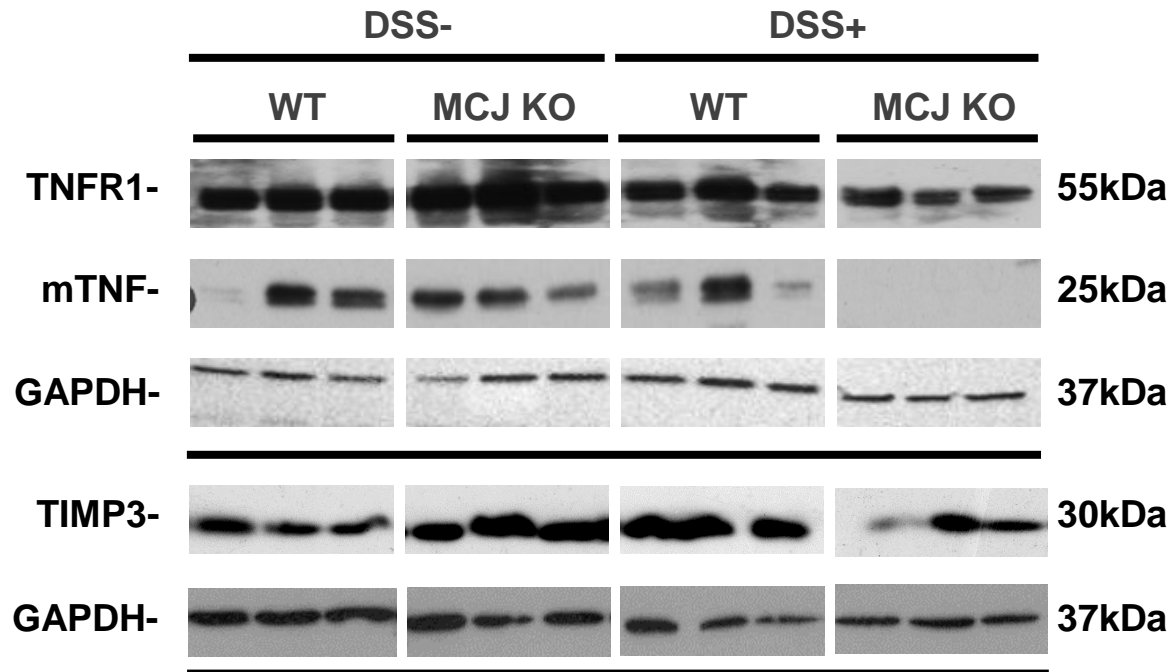

Supplement: 41598_2019_57348_MOESM2_ESM.pdf [file 41598_2019_57348_MOESM2_ESM.pdf]
