# Supplementary material for: The mitochondrial negative regulator MCJ modulates the interplay between microbiota and the host during ulcerative colitis
Source: PubMed Central journal article supplement (PMC6969106; doi:10.1038/s41598-019-57348-0), 2020-01-17
Supplement: 41598_2019_57348_MOESM4_ESM.pdf [file 41598_2019_57348_MOESM4_ESM.pdf]

# **The mitochondrial negative regulator MCJ modulates the interplay between microbiota and the host during ulcerative colitis**

Miguel Angel Pascual-Itoiz<sup>1†</sup>, Ainize Peña-Cearra<sup>1,2†</sup>, Itziar Martín-Ruiz<sup>1</sup>, José Luis Lavín<sup>1</sup>,  
Carolina Simó<sup>3</sup>, Héctor Rodríguez<sup>1</sup>, Estibaliz Atondo<sup>1</sup>, Juana María Flores<sup>4</sup>, Ana Carreras-  
González<sup>1</sup>, Julen Tomás-Cortázar<sup>1</sup>, Diego Barriales<sup>1</sup>, Ainhoa Palacios<sup>1</sup>, Virginia García-  
Cañas<sup>3</sup>, Aize Pellón<sup>1</sup>, Asier Fullaondo<sup>2</sup>, Ana M<sup>a</sup> Aransay<sup>1,6</sup>, Rafael Prados-Rosales<sup>1</sup>, Rebeca  
Martín<sup>5</sup>, Juan Anguita<sup>1,7</sup>, Leticia Abecia<sup>1\*</sup>

**Supplementary Table 1.** Forward and reverse primer sequences for mouse *Tlr2*, *Tlr4*, *Tlr5*, *Tlr9*, *Myd88*, *Trif*, *Il-6*, *Il1b*, *Ptgs2*, *Nos2*, *Tnf*, *Adam17*, *Timp3*, *Tnfr1*, *Tnfr2*, *Tgfb*, *Il-10*, *Ifny*, *Stat1*, *Muc2*, *Muc3*, *Tjp1*, *Pigr*, *Cld2*, *Cldn5*, *Ocln1*, *Dnajc15*, *Reg3b*, *Reg3g*, and *Rpl19*, and qPCR conditions, reagents, instrument and quantification.

| Gene          | Forward (F) and reverse (R) primer sequences | Annealing temperature (°C) |
|---------------|----------------------------------------------|----------------------------|
| <i>Tlr2</i>   | F: GCAGAATCAATACAATAGAGGGAGACGC              | 60                         |
|               | R: AAGTGAAGAGTCAGGTGATGGATGTCG               |                            |
| <i>Tlr4</i>   | F: GCAATGTCTCTGGCAGGTGTA                     | 60                         |
|               | R: CAAGGGATAAGAACGCTGAGA                     |                            |
| <i>Tlr5</i>   | F: ATGGCATGTCAACTTGACTT                      | 55                         |
|               | R: GATCCTAAGATTGGGCAGGT                      |                            |
| <i>Tlr9</i>   | F: CAGCTAAAGGCCCTGACCAA                      | 58                         |
|               | R: GCGATCCACCGTCTTGAGAA                      |                            |
| <i>Myd88</i>  | F: CCGCCTATCGCTGTTCTTGA                      | 59                         |
|               | R: GCCAGGCATCCAACAACTG                       |                            |
| <i>Trif</i>   | F: GGACCCACCTAGATGGCTA                       | 59                         |
|               | R: CCCAAGCTAAGTCCTCTGGC                      |                            |
| <i>Il6</i>    | F: ACCACGGCCTTCCCTACTTCAC                    | 60                         |
|               | R: TTCTCATTTCACGATTTCCCAG                    |                            |
| <i>Il1b</i>   | F: AACTCCTTAGTCCTCGGCCA                      | 60                         |
|               | R: CCATCAGAGGCAAGGAGGAA                      |                            |
| <i>Ptgs2</i>  | F: GGGTTGCTGGGGGAAGAAATG                     | 58                         |
|               | R: GGTGGCTGTTTTGGTAGGCTG                     |                            |
| <i>Nos2</i>   | F: GTTGAAGACTGAGACTCTGG                      | 58                         |
|               | R: GACTAGGCTACTCCGTGGA                       |                            |
| <i>Tnf</i>    | F: AGCCACGTCGTAGCAAACCAC                     | 60                         |
|               | R: ATCGGCTGGCACCCTAGTTGGT                    |                            |
| <i>Adam17</i> | F: TGGGACACAATTTTGGAGCA                      | 60                         |
|               | R: CCTCCTTGTCCTCATTGG                        |                            |
| <i>Timp3</i>  | F: GGCCTCAATTACCGCTACCA                      | 60                         |
|               | R: CTGATAGCCAGGGTACCCAAAA                    |                            |
| <i>Tnfr1</i>  | F: GCTGTTGCCCTGGTTATCT                       | 60                         |
|               | R: ATGGAGTAGACTTCGGGCCT                      |                            |
| <i>Tnfr2</i>  | F: CTCTCCAAGCCCACCGAAAT                      | 60                         |
|               | R: GGACCACTGAGTTACAGCCC                      |                            |
| <i>Tgfb</i>   | F: CACTGATACGCCTGAGTG                        | 60                         |
|               | R: GTGAGCGCTGAATCGAAA                        |                            |
| <i>Il10</i>   | F: TGGCCCAGAAATCAAGGAGC                      | 58                         |
|               | R: CAGCAGACTCAATACACACT                      |                            |
| <i>Ifng</i>   | F: TGGTGACATGAAAATCCTGCAGAG                  | 59                         |
|               | R: GCTTATGTTGTTGCTGATGGCCTG                  |                            |

|                   |                                                                                                                                       |    |
|-------------------|---------------------------------------------------------------------------------------------------------------------------------------|----|
| <i>Stat1</i>      | F: TCTGAATATTTCCCTCCTGGG                                                                                                              | 60 |
|                   | R: CGGAAAAGCAAGCGTAATCT                                                                                                               |    |
| <i>Muc2</i>       | F: GATAGGTGGCAGACAGGAGA                                                                                                               | 58 |
|                   | R: GCTGACGAGTGGTTGGTGAATG                                                                                                             |    |
| <i>Muc3</i>       | F: CGTGGTCAACTGCGAGAATGG                                                                                                              | 58 |
|                   | R: CGGCTCTATCTCTACGCTCTC                                                                                                              |    |
| <i>Tjp1</i>       | F: GTTGGTACGGTGCCCTGAAAGA                                                                                                             | 58 |
|                   | R: GCTGACAGGTAGGACAGACGAT                                                                                                             |    |
| <i>Pigr</i>       | F: CGAAGCTACAAGGGAGCCAA                                                                                                               | 60 |
|                   | R: ACGGATAGTGGCAGGAAACG                                                                                                               |    |
| <i>Cldn2</i>      | F: AGGACTTCCTGCTGACATCCAG                                                                                                             | 58 |
|                   | R: AATCCTGGCAGAACACGGTGCA                                                                                                             |    |
| <i>Cldn5</i>      | F: TGA CTGCCTTCCTGGACCACAA                                                                                                            | 60 |
|                   | R: CATA CACCTTGCACTGCATGTGC                                                                                                           |    |
| <i>Ocln1</i>      | F: TGGCAAGCGATCATACCCAGAG                                                                                                             | 58 |
|                   | R: CTGCCTGAAGTCATCCACA CT C                                                                                                           |    |
| <i>Dnajc15</i>    | F: ACGCCGACATCGACCACACAG                                                                                                              | 58 |
|                   | R: AATCTTCCTTGCTGTTGCCGTG                                                                                                             |    |
| <i>Reg3b</i>      | F: TACTGCCTTAGACCGTGCTTTCTG                                                                                                           | 60 |
|                   | R: GACATAGGGCAACTTCACCTCACA                                                                                                           |    |
| <i>Reg3g</i>      | F: TTCCTGTCCTCCATGATCAAAA                                                                                                             | 60 |
|                   | R: CATCCACCTCTGTTGGGTTCA                                                                                                              |    |
| <i>Caspase-3</i>  | F: ATGGAGAACAACAAAACCTCAGT                                                                                                            | 60 |
|                   | R: TTGCTCCCATGTATGGTCTTTAC                                                                                                            |    |
| <i>Rpl19</i>      | F: GACCAAGGAAGCACGAAAGC                                                                                                               | 60 |
|                   | R: CAGGCCGCTATGTACAGACA                                                                                                               |    |
| <b>Conditions</b> | Hold cycle 95°C for 2.30', and then 40x (95°C for 15", 60°C for 1')                                                                   |    |
| <b>Reagents</b>   | PerfeCTa SYBR® Green SuperMix (Quantabio)                                                                                             |    |
| <b>Instrument</b> | QuantStudio 6 Flex Real-Time PCR System                                                                                               |    |
| <b>Expression</b> | Normalized to <i>Rpl19</i> housekeeping gene using the Pfaffl equation and expressed relative to the mean of a relevant control group |    |
